# Supplementary material for: Lack of evidence for associative learning in pea plants
Source: eLife. 2020 Jun 23;9:e57614. doi: 10.7554/eLife.57614 (PMC7311169; doi:10.7554/eLife.57614)
Supplement: Source data 1. [file elife-57614-data1.xlsx]

## Sheet: Summary and statistics
Markel results summary
Condition	F + L	F + L control	F vs L	F vs L control	Moving Light	Moving Light Fan Opposite combined with Moving Light Fan Adjacent - towards fan	Pooled Phototropism	Moving Light Fan Opposite	Moving Light Fan Adjacent
Towards Light	38	43	20	23	16	34	82	11	15
Away Light	23	17	22	17	11	19	45	19	8
Percent Towards	62	71	47	57	59	64	64	36	65
Percent Away	38	29	53	43	-41	-36	-36	64	35
Comparison made with Fisher's exact test (only included for cross-column comparisons explicit, if empty the comparison is within-column)	F + L to F + L Control		F vs L to F vs L control					Moving Light Fan Opposite to Moving Light Fan Adjacent
two-tailed p value	0.335		0.3869					0.0542
Two-tailed p value (Fisher's exact test) for comparison against random choice (NB - Fisher's exact test requires integer numbers, so two p values are given when the sample size is an odd number, one for rounding up and one for rounding down - these act as bounds for the true p value. In practice, the difference is always very small. IN the manuscript, I report the mean of these two values as a be…	0.2018, 0.2047	0.0243	1	0.6541	0.5857, 0.5913	0.1698, 0.1729	0.0223, 0.0227	0.4348	0.3726, 0.3801
Gagliano et al. Results summary
Condition	F + L Experiment 1	F + L Experiment 1 Control	F + L Total (Experiment 1 + 2-light condition)	F + L control Total (Experiment 1 + 2)	F vs L	F vs L control	stationary light	stationary fan
Towards Light	5	10	7	20	4	9	10	13
Away Light	8	0	11	0	9	0	0	17
Percent Towards	38	100	38	100	30	100	100	43
Percent Away	62	0	62	0	70	0	0	57
Comparison made with Fisher's exact test	F + L Experiment 1 to F + L Control Experiment 1		F + L Total to F + L Total Control		F vs L to F vs L control
two-tailed p value	0.0027 (as reported)		0.0001		0.0017 (as reported)
Two-tailed p value (Fisher's exact test) for comparison against random choice (NB - Fisher's exact test requires integer numbers, so two p values are given when the sample size is an odd number, one for rounding up and one for rounding down.)	0.7036, 0.6951	0.0325	0.738	0.0004	0.4283, 0.4401	0.0325, 0.0294	0.0325	0.7961

## Sheet: Raw data
NB: L and R indicate growth to the left or right, respectively, whereas x indicates disqualification by the experimentor prior to scoring, in most cases due to plants growing too fast. N indicates growth into neither tube. A color-coding scheme is used for counting convenience, where if in each trio column the colors match then the phototropic response was observed. Subtotals are calculated at th…
Moving Light Fan Opposite	Phototrop	Result		Moving Light Fan Adjacent	Phototrop	Result		F + L	Phototrop	Result		F + L ctrl	Phototrop	Result		F vs L	Phototrop	Result		F vs L ctrl	Phototrop	Result
209	R	R		229	R	R		312	L	L		308	L	R		300	L	L		203	L	R
210	L	L		309	L	N		277	L	L		314	L	L		287	L	L		242	L	L
238	R	X		322	R	R		296	L	L		284	L	N		245	L	L		324	L	N
263	L	R		205	L	L		281	L	L		220	L	N		278	L	L		310	L	L
268	R	L		264	R	R		215	L	L		222	L	L		204	L	L		321	L	L
290	L	N		303	L	N		330	R	N		212	R	R		219	R	R		293	R	R
270	R	N		269	R	N		216	R	N		328	R	R		200	R	X		315	R	N
260	L	N		233	L	N		299	R	R		261	R	R		226	R	R		302	R	N
218	R	N		275	R	R		305	R	N		273	R	R		232	R	N		241	R	N
224	L	L		286	L	L		206	R	L		239	R	L		316	R	R		257	R	L
		3:2				6:0		253	L	R		248	L	L		247	L	N		297	L	R
2017-08-17				2017-08-17				256	L	L		320	L	R		252	L	R		231	L	L
125	L	x		101	L	R		258	L	N		306	L	N		291	L	N		267	L	R
83	L	x		123	L	x		244	L	R		326	L	R		201	L	R		240	L	L
133	L	x		126	L	N		280	L	L		230	L	L		237	L	L		251	L	L
51	L	R		113	L	R		323	R	R		236	R	R		225	R	L		227	R	R
68	L	N		90	L	R		246	R	R		329	R	L		313	R	N		295	R	R
62	L	R		105	L	L		272	R	N		283	R	R		285	R	L		282	R	L
100	L	x		55	L	N		217	R	L		235	R	R		208	R	L		202	R	L
76	L	N		70	L	R		223	R	R		254	R	L		288	R	N		255	R	N
40	L	R		108	L	x		292	L	R		213	L	L		265	L	L		221	L	N
38	L	x		35	L	x		327	R	N		317	R	N		266	R	L		294	R	N
127	R	x		82	R	R		307	R	X		325	R	N		207	L	L		262	R	L
59	R	x		154	R	R		311	R	N		318	R	L		249	R	L		298	L	N
52	R	R		31	R	x		211	L	N		279	L	N		271	L	L		259	R	N
135	R	N		45	R	x				11:5				12:7				12:7				9:7
94	R	x		151	R	x		2017-08-17				2017-08-17				2017-08-17				2017-08-17
132	R	x		84	R	x		107	L	N		104	L	x		81	L	R		158	L	L
92	R	L		157	R	R		71	L	N		87	L	R		102	L	N		44	L	x
111	R	x		79	R	R		122	L	x		138	L	L		109	L	x		156	L	x
119	R	x		95	R	x		64	L	R		67	L	x		41	L	R		56	L	R
72	R	L		36	R	R		155	L	L		80	L	R		34	L	N		96	L	R
		1:5				6:4		43	R	R		85	R	N		130	R	L		128	R	x
								32	R	x		110	R	R		140	R	L		91	R	x
								53	R	L		39	R	R		97	R	R		42	R	R
								46	R	R		93	R	N		65	R	x		54	R	x
								99	R	x		103	R	N		89	R	N		49	R	R
								77	L	R		112	L	x		129	L	R		8	L	L
								136	L	x		37	L	L		121	L	R		118	L	R
								57	L	R		48	L	L		120	L	R		152	L	N
								88	L	L		30	L	L		60	L	N		78	L	x
								106	L	R		117	L	x		69	L	R		50	L	L
								139	R	R		61	R	R		134	R	R		137	R	R
								86	R	R		47	R	N		33	R	x		66	R	R
								159	R	L		58	R	R		116	R	x		153	R	L
								74	R	x		75	R	R		63	R	x		131	R	R
								72	R	L		114	R	x		115	R	L		124	R	R
										6:7				9:2				2:8				9:4		Moving Light
2017-08-27				2017-08-27				2017-08-27				2017-08-27				2017-08-27				2017-08-27				2017-08-27	Phototrop	Result
129	L	x		90	R	N		118	L	R		36	L	N		72	R	x		108	R	R		37	R	N
63	L	N		105	R	N		77	L	L		71	L	L		144	R	R		127	R	R		89	R	R
140	L	R		85	R	R		46	L	R		72	L	x		109	R	N		35	R	x		97	R	R
99	L	R		61	R	L		47	L	R		76	L	R		136	R	R		158	R	R		39	R	R
116	L	L		57	R	L		8	L	L		66	L	L		54	R	x		65	R	L		50	R	R
131	L	N		53	R	R		52	R	N		48	R	N		152	L	L		67	L	N		60	R	N
51	L	L		86	R	L		55	R	N		34	R	R		78	L	R		147	L	R		113	R	N
154	L	R		106	R	R		41	R	x		42	R	R		104	L	R		145	L	R		120	R	R
121	L	N		110	R	N		43	R	L		58	R	x		119	L	N		146	L	L		137	R	R
130	L	N		56	R	L		139	R	R		126	R	R		149	L	R		117	L	N		44	R	R
		2:3				3:4		124	L	N		155	L	N		157	R	L		84	R	L		102	L	x
								138	L	N		33	L	N		114	R	L		148	R	N		101	L	N
								153	L	R		134	L	L		133	R	N		142	R	N		75	L	L
								70	L	L		40	L	N		128	R	L		59	R	N		103	L	R
								30	L	R		49	L	L		135	R	N		141	R	L		62	L	N
								38	R	R		95	R	N		83	L	L		31	L	R		69	L	N
								125	R	R		91	R	L		151	L	L		156	L	x		107	L	L
								94	R	R		100	R	R		112	L	L		123	L	N		80	L	L
								45	R	N		122	R	N		32	L	N		159	L	L		79	L	N
								132	R	N		143	R	L		74	L	R		111	L	N		68	L	N
										7:6				8:3			total	6:7			total	5:6				10:1
Sept 3 Light vs F								Sept 3 F + L				Sept 3 F + L ctrl					selected	3:4			selected	1:3		Sept 3 Moving light
107	L	L						45	L	L		97	L	L			unselected	3:3			unselected	4:3		70	L	L
62	L	R						69	L	N		76	L	L										114	L	N
42	L	N						106	L	R		99	L	N										78	L	R
67	L	N						83	L	L		48	L	L										66	L	R
153	L	N						72	L	L		90	L	N										157	L	x
117	R	N						110	R	R		91	R	x										119	R	N
40	R	x						109	R	N		113	R	N										54	R	N
139	R	R						74	R	x		65	R	R										158	R	L
145	R	L						85	R	N		60	R	N										148	R	R
50	R	N						156	R	N		75	R	R										149	R	N
154	L	R						127	L	L		134	L	N										124	L	N
58	L	L						138	L	R		152	L	R										116	L	R
136	L	R						159	L	x		126	L	L										146	L	R
144	L	R						121	L	L		59	L	R										142	L	N
118	L	x						57	L	L		155	L	L										56	L	R
123	R	x						132	R	R		133	R	R										53	R	N
141	R	L						143	R	L		125	R	R										49	R	N
55	R	N						147	R	L		120	R	x										105	R	L
137	R	x						130	R	x		151	R	x										129	R	R
140	R	R						135	R	R		131	R	R										47	R	L
71	L	R						33	L	R		73	L	R										63	L	R
44	L	N						38	L	N		122	L	R										104	L	N
43	L	R						128	L	L		112	L	N										89	L	N
68	L	L						32	L	N		86	L	R										80	L	R
52	L	R						34	L	N		35	L	L										41	L	N
101	R	N						8	R	R		31	R	R										100	R	R
95	R	N						79	R	R		102	R	x										46	R	N
51	R	N						30	R	N		36	R	N										103	R	R
61	R	N						37	R	R		39	R	R										94	R	N
108	R	N						84	R	R		77	R	R										111	R	R
		5:9								14:5				14:5												06:10:00
